# Supplementary material for: MDA-9/Syntenin (SDCBP) Is a Critical Regulator of Chemoresistance, Survival and Stemness in Prostate Cancer Stem Cells
Source: MDPI journal article supplement (doi:10.3390/cancers12010053), 2019-12-23
Supplement: s1 [file s1]

## Supplementary Materials and Methods

### Plasmids

Small hairpin (sh)RNA for *mda-9/syntenin* (*shmda-9/syntenin*) was created with pSilencer hygro expression vectors according to the manufacturer's protocol (Ambion). The specific hairpin small interfering (si)RNA oligonucleotides sequences are:

sense

5'GATCCGCGGATGGCACCAAGCATTTTCAAGAGAAATGCTTGGTGCCATCCGCTTTT  
TTGAAA-3'

and antisense

5'AGCTTTTCCAAAAAGCGGATGGCACCAAGCATTTCTCTTGAAAATGCTTGGTGCC  
ATCCGCG-3'

The oligo nucleotides were annealed and ligated to pSilencer vector by T4 DNA ligase. Alternate siRNA sequences were obtained through Qiagen with the following sequences: 5'-TTGACTCTTAAGATTATGTAA-3' (*simda-9* #3). *shmda-9* resistant *mda-9/syntenin* plasmid was created using the following primer sequences:

forward

5'-GCCTGCTTTTATCTTTGAACATATTATTAAGCGAATGAAGCCTAGTATAATGAAAA  
GCCTAATGGACCACACCATTTCCTGAG-3'

and reverse:

3'-CGGACGAAAATAGAACTTGTATAATAATTCGCTTACTTCGGATCATATTACTTTT  
CGGATTACCTGGTGTGGTAAGGACTC-5'.

These plasmids were cleaved and transfected into HEK-293 cells to obtain the corresponding Ad.5/3-based vectors. The viruses were then expanded using HEK-293 cells and purified by cesium chloride double ultracentrifugation (Beckman SW28 rotor) using standard protocols (OD260 Inc., Boise, ID). The infectious viral particles were titered by plaque assay as described [46].

### RT-PCR Thermofisher Taqman Probes

*mda-9* Hs01045460\_g1  
*myc* Hs00153408\_m1  
*Nanog* Hs04399610\_g1  
*Sox2* Hs00415716\_m1  
*Oct4* Hs04260367\_gH  
*CD133* Hs01009250\_m1  
*Notch1* Hs01062014\_m1  
*18S* Hs99999901\_s1  
*ABCB1* Hs00184500\_m1  
*ABCC1* Hs01561483\_m1  
*ABCC2* Hs00960488\_m1

ABCC3 Hs00358656\_m1

ABCC5 Hs00981089\_m1

ABCG2 Hs01053790\_m1

The interrogated sequence for each probe can be obtained at the Thermofisher Gene expression assays (Taqman) site.

#### *PCR conditions*

SuperScript™ Double-Stranded cDNA Synthesis Kit from Invitrogen was used to generate cDNA. We used the protocol as suggested by the company. 1 µg of Total RNA was used per 20 µl cDNA reaction. The tube was placed in the PCR machine programmed as follows: 25°C - 10 min, 50°C - 50 min, 85°C - 5 min. For RT-PCR, the cDNA reaction was diluted 1:10 with DEPC water and use 5 µl as template for a 20 µl RT-PCR reaction. RT-PCR was performed using ViiA 7 fast real-time PCR system, using the company protocol. These PCR conditions included polymerase activation at 95°C for 4 min followed by 30 cycles at 95°C for 30 sec, 63°C for 30 sec, and 72°C for 30 sec.

#### *Virus Infections*

Viral infections were performed as described previously [46].

#### *Transfections*

The cells were transfected with an constitutively active CA-STAT3 construct with Lipofectamine 2000 as described [45].

#### *Immunohistochemistry*

The mice were monitored and euthanized according to an approved protocol, and the tumors were dissected. The tumor samples from all the groups of animals were fixed in phosphate-buffered formalin and paraffin sections were prepared using standard histology protocols. Paraffin-embedded sections were dewaxed and rehydrated through incubations in xylene and a gradient series of alcohol. Antigen retrieval was performed in 10 mM citric acid (pH 6.0) with microwave treatment for 20 min. Endogenous hydrogen peroxidase was quenched by 3% (vol/vol) H<sub>2</sub>O<sub>2</sub> treatment for 20 min. Nonspecific binding sites were blocked with a solution of 5% (vol/vol) normal sera, and the sections were incubated with antibody overnight. The sections were incubated with biotinylated secondary antibodies and subsequently with avidin–biotin complex peroxidase (Vector Elite; Vector Laboratories). Colorimetric reactions were developed by DAB substrate (0.02% DAB (3,3'-diaminobenzidine), 0.005% hydrogen peroxide) treatment followed by 10% (vol/vol) Harris hematoxylin counterstaining. Hematoxylin & eosin staining was also conducted following a standard protocol as described earlier [46]. The images were analyzed under an Olympus BX41 microscope system equipped with DP25 digital camera and software.

#### *Antibodies*

CD44, CD133 were obtained from Miltenyi Biotec. MDA-9 antibody was obtained from Alpha-Diagnostic International (San Antonio, TX). IGFR, P-IGFR, P-STAT3, STAT3, Beta-actin, and MDR1 antibodies were obtained from Cell Signaling (Beverly, MA).
