# Supplementary material for: MDA-9/Syntenin (SDCBP) Is a Critical Regulator of Chemoresistance, Survival and Stemness in Prostate Cancer Stem Cells
Source: MDPI journal article supplement (doi:10.3390/cancers12010053), 2019-12-23
Supplement: s1 [file s1]

Article

# MDA-9/Syntenin (SDCBP) Is a Critical Regulator of Chemoresistance, Survival and Stemness in Prostate Cancer Stem Cells

Sarmistha Talukdar <sup>1,2</sup>, Swadesh K. Das <sup>1,2,3</sup>, Anjan K. Pradhan <sup>1,2</sup>, Luni Emdad <sup>1,2,3</sup>, Jolene J. Windle <sup>1,2,3</sup>, Devanand Sarkar <sup>1,2,3</sup> and Paul B. Fisher <sup>1,2,3,\*</sup>

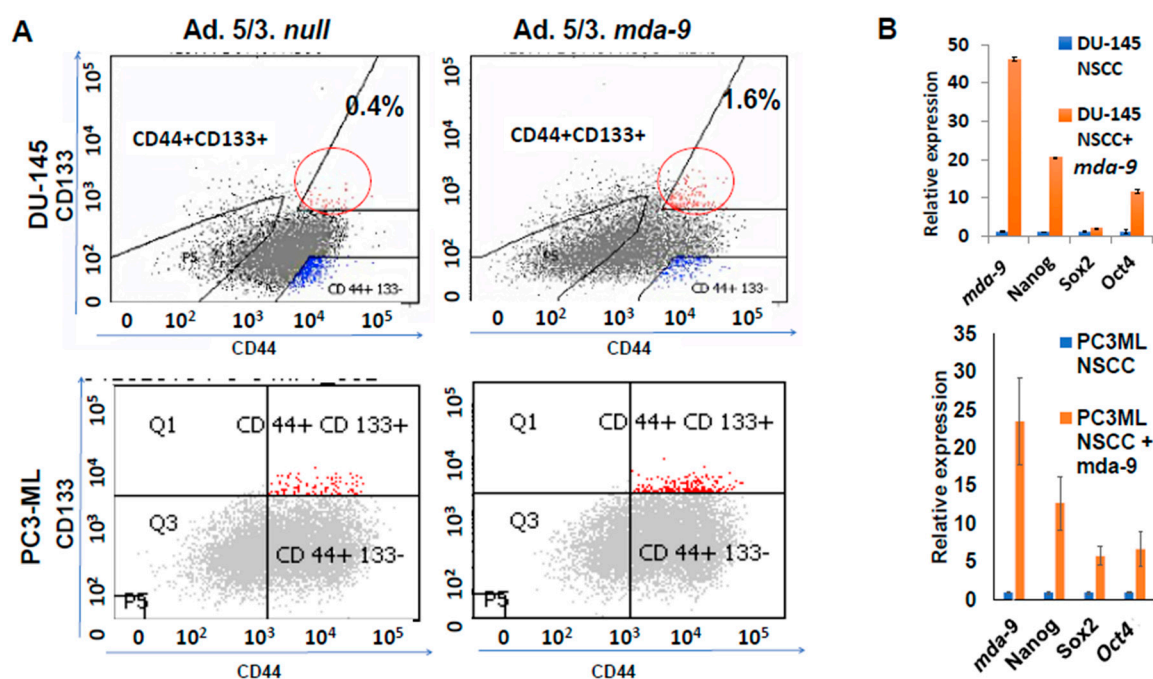

**Figure S1.** Effect of *mda-9* overexpression on PCSCs. Effect of overexpression of *mda-9* in prostate cancer stem cells and non-stem cancer cells on (A) stem populations as assayed by cell surface stemness markers and (B) stem regulatory molecule (NANOG, OCT4 and SOX2) expression.

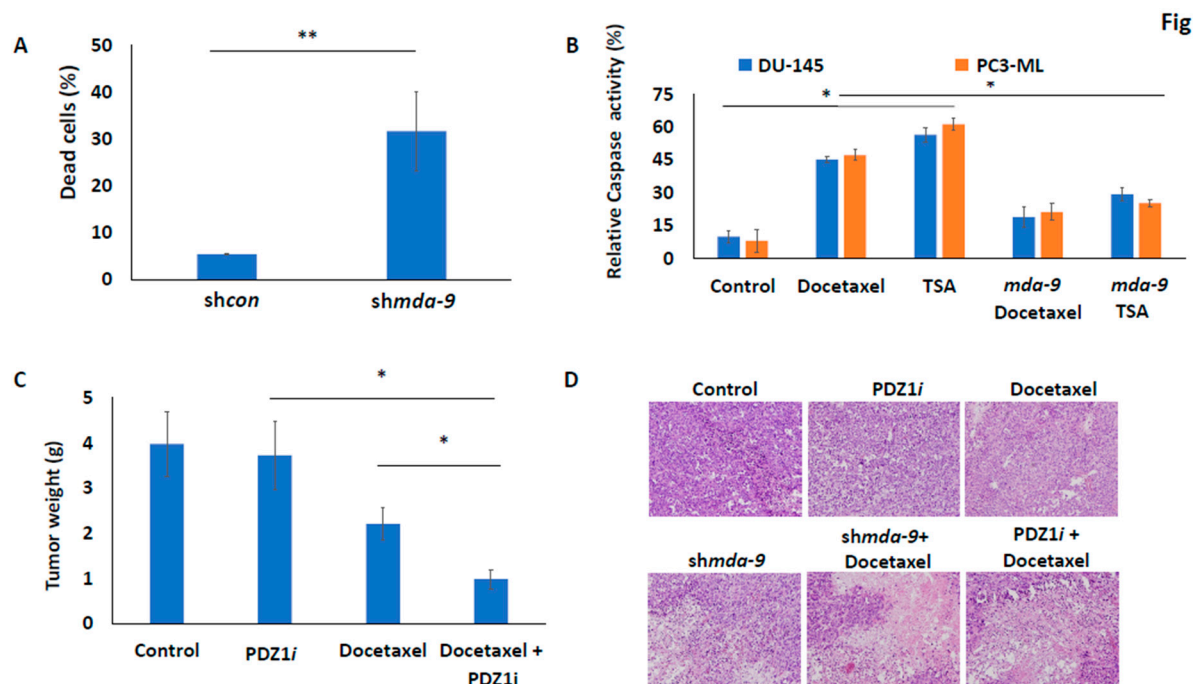

**Figure S2. Effect of kd of *mda-9* on PCSCs.** KD of *mda-9* enhances PCSC cell death (A). PCSC sensitivity to docetaxel and TSA treatment *in vitro* and effect of *mda-9* overexpression on PCSC sensitivity to chemotherapeutics. (B) Effect of PDZ1i (pharmacological inhibitor of MDA-9) on docetaxel sensitivity of tumors measured by tumor weight (C) and analyzed by histopathology (D). Bars represent SEM. \* $P < 0.05$ , using student t-test and ANOVA.

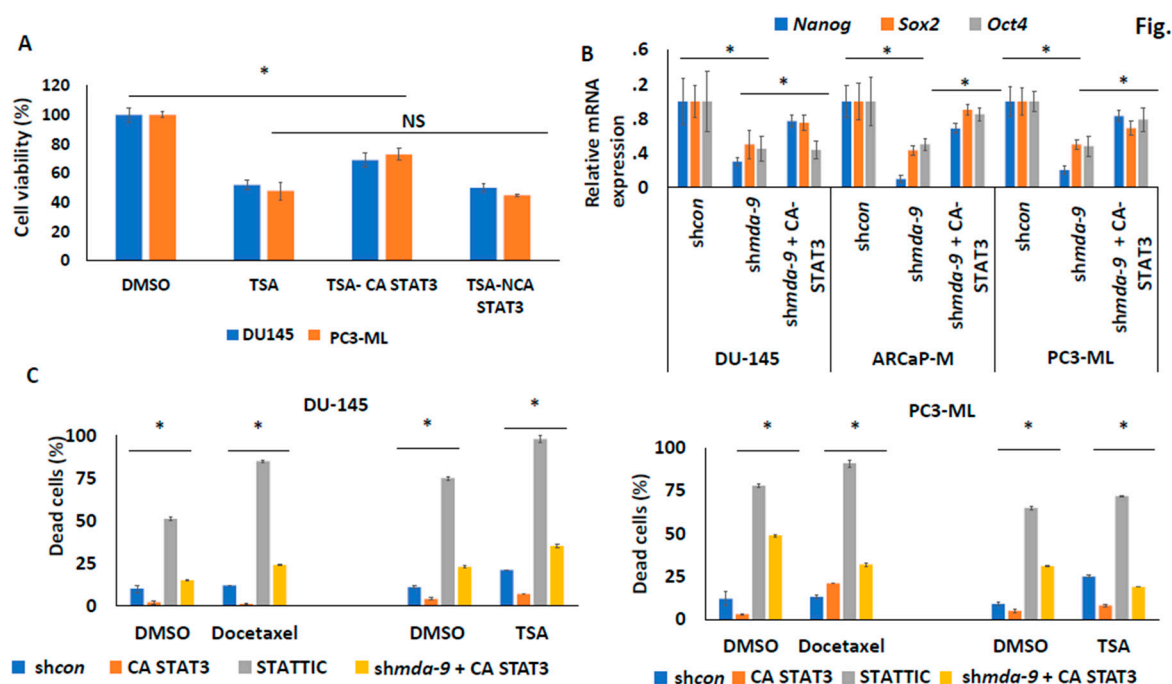

**Figure S3. MDA-9-mediated STAT3 regulation, and its downstream effects in PCSCs.** (A) STAT3 signaling through MDA-9 regulates chemosensitivity to the HDAC inhibitor TSA. (B) STAT3 activation by MDA-9 regulates stem regulatory molecules including OCT4, SOX2 and NANOG. (C) Image analysis data showing the role of STAT3 in MDA-9-based chemoresistance to Docetaxel and TSA in DU-145 and PC3-ML PCSCs. Bars represent SEM. \* $P < 0.05$ , using student t-test and ANOVA. NS depicts results that are not statistically significant.

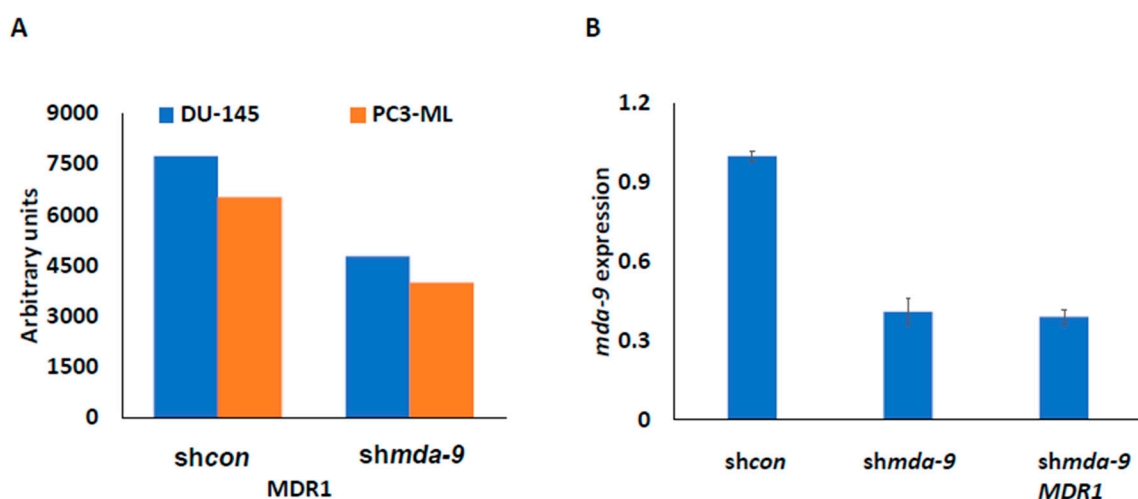

**Figure S4.** (A) Image J analysis of the Western blots shown in Figure 5C to quantify MDR1 expression. (B) Expression of *mda-9* in shcontrol, *mda-9* kd and *mda-9* kd PCSCs overexpressing MDR1.

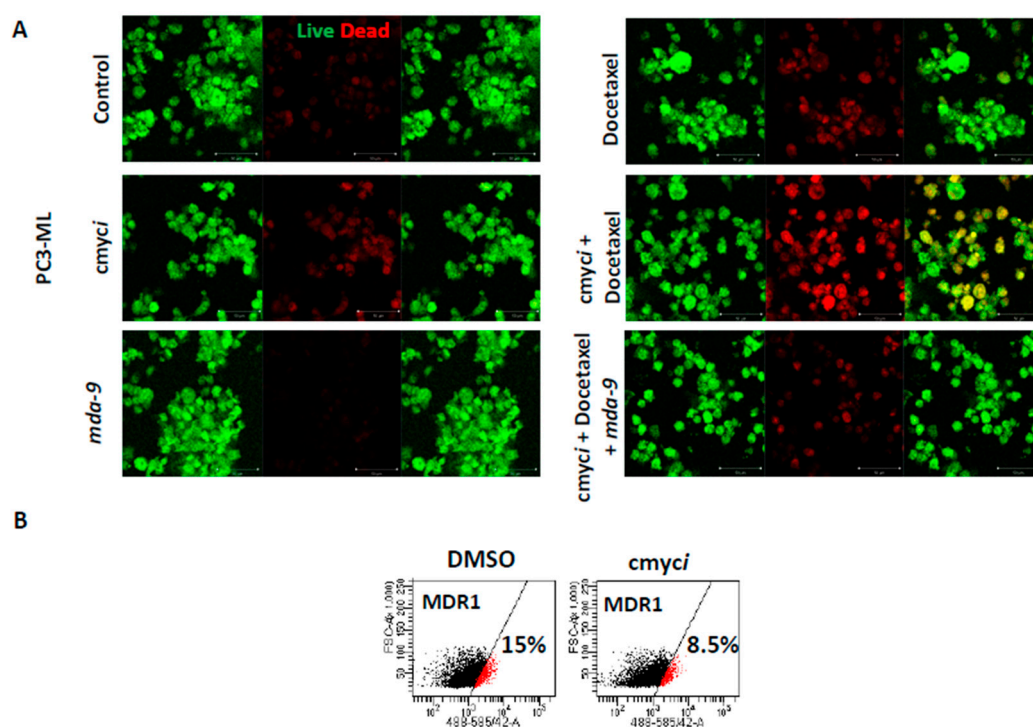

**Figure S5.** MDA-9 regulates chemoresistance in PCSCs through the *cmyc*/MDR1 axis. (A) Live/Dead analysis of PCSC sensitivity to Docetaxel after *cmyci*, Docetaxel, *mda-9* overexpression treatment alone and in combination. (B) Effect of *cmyc* inhibition on MDR1 expression.

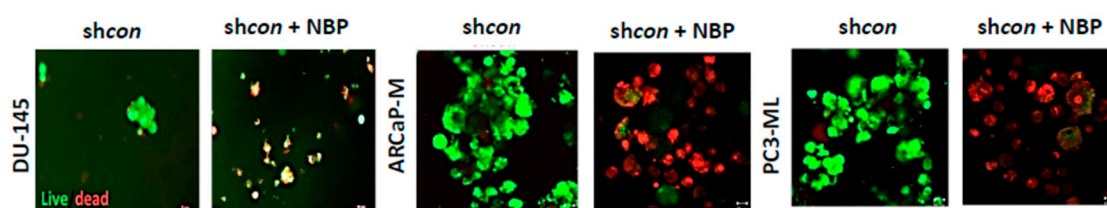

**Figure S6.** *mda-9* regulates PCSC survival through the NOTCH1 pathway. Peptide blocking studies to elucidate the effect of Notch1 blocking peptide (NBP) on PCSC viability; live cells are green, dead cells are red.
