# Supplementary figures and images for: MDA-9/Syntenin (SDCBP) Is a Critical Regulator of Chemoresistance, Survival and Stemness in Prostate Cancer Stem Cells
Source: MDPI journal article supplement (doi:10.3390/cancers12010053), 2019-12-23

Figure 5C

IB : anti-MDR1

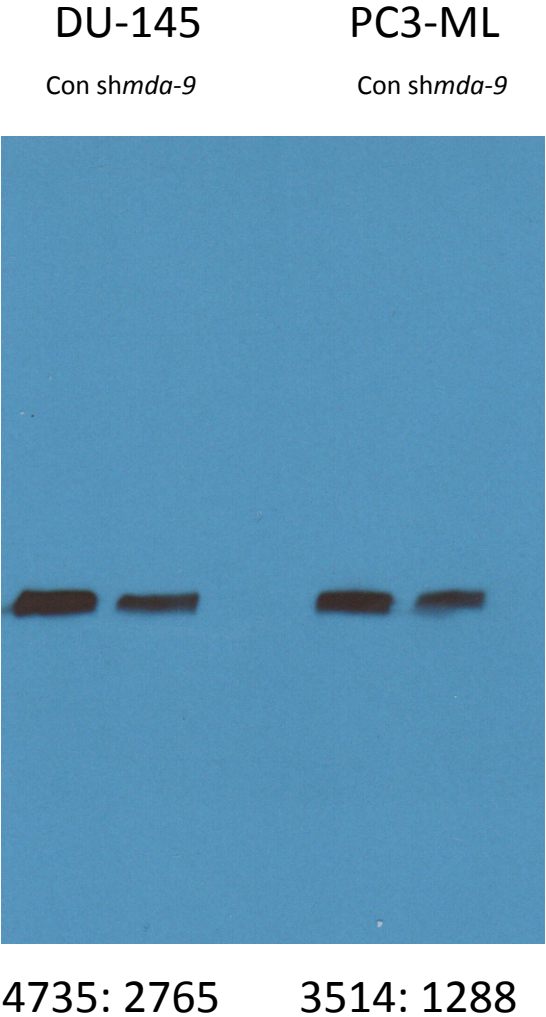

IB : anti-MDA-9

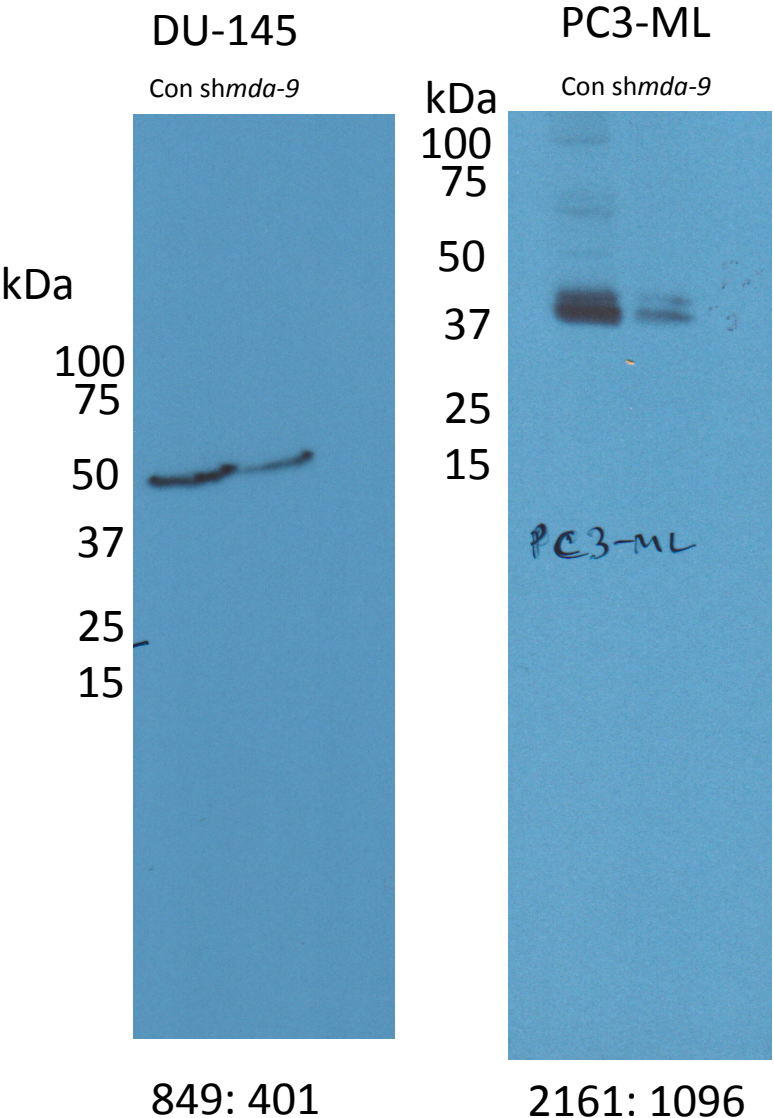

IB : anti-Beta actin

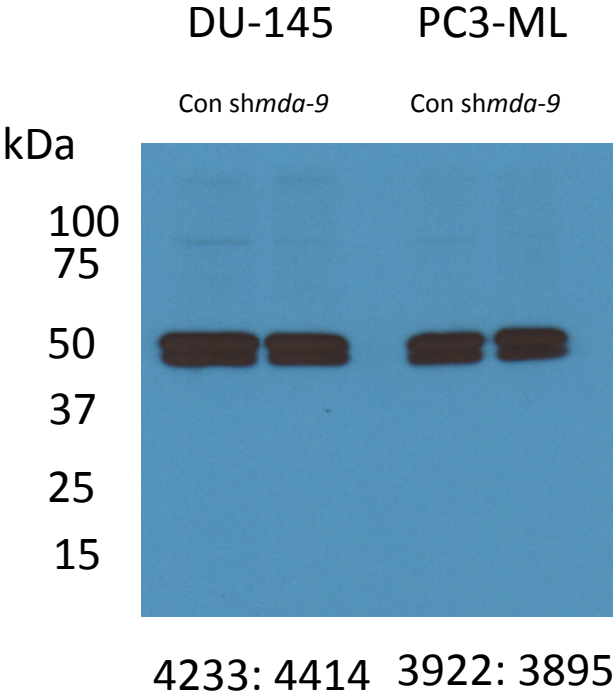



Figure 6B

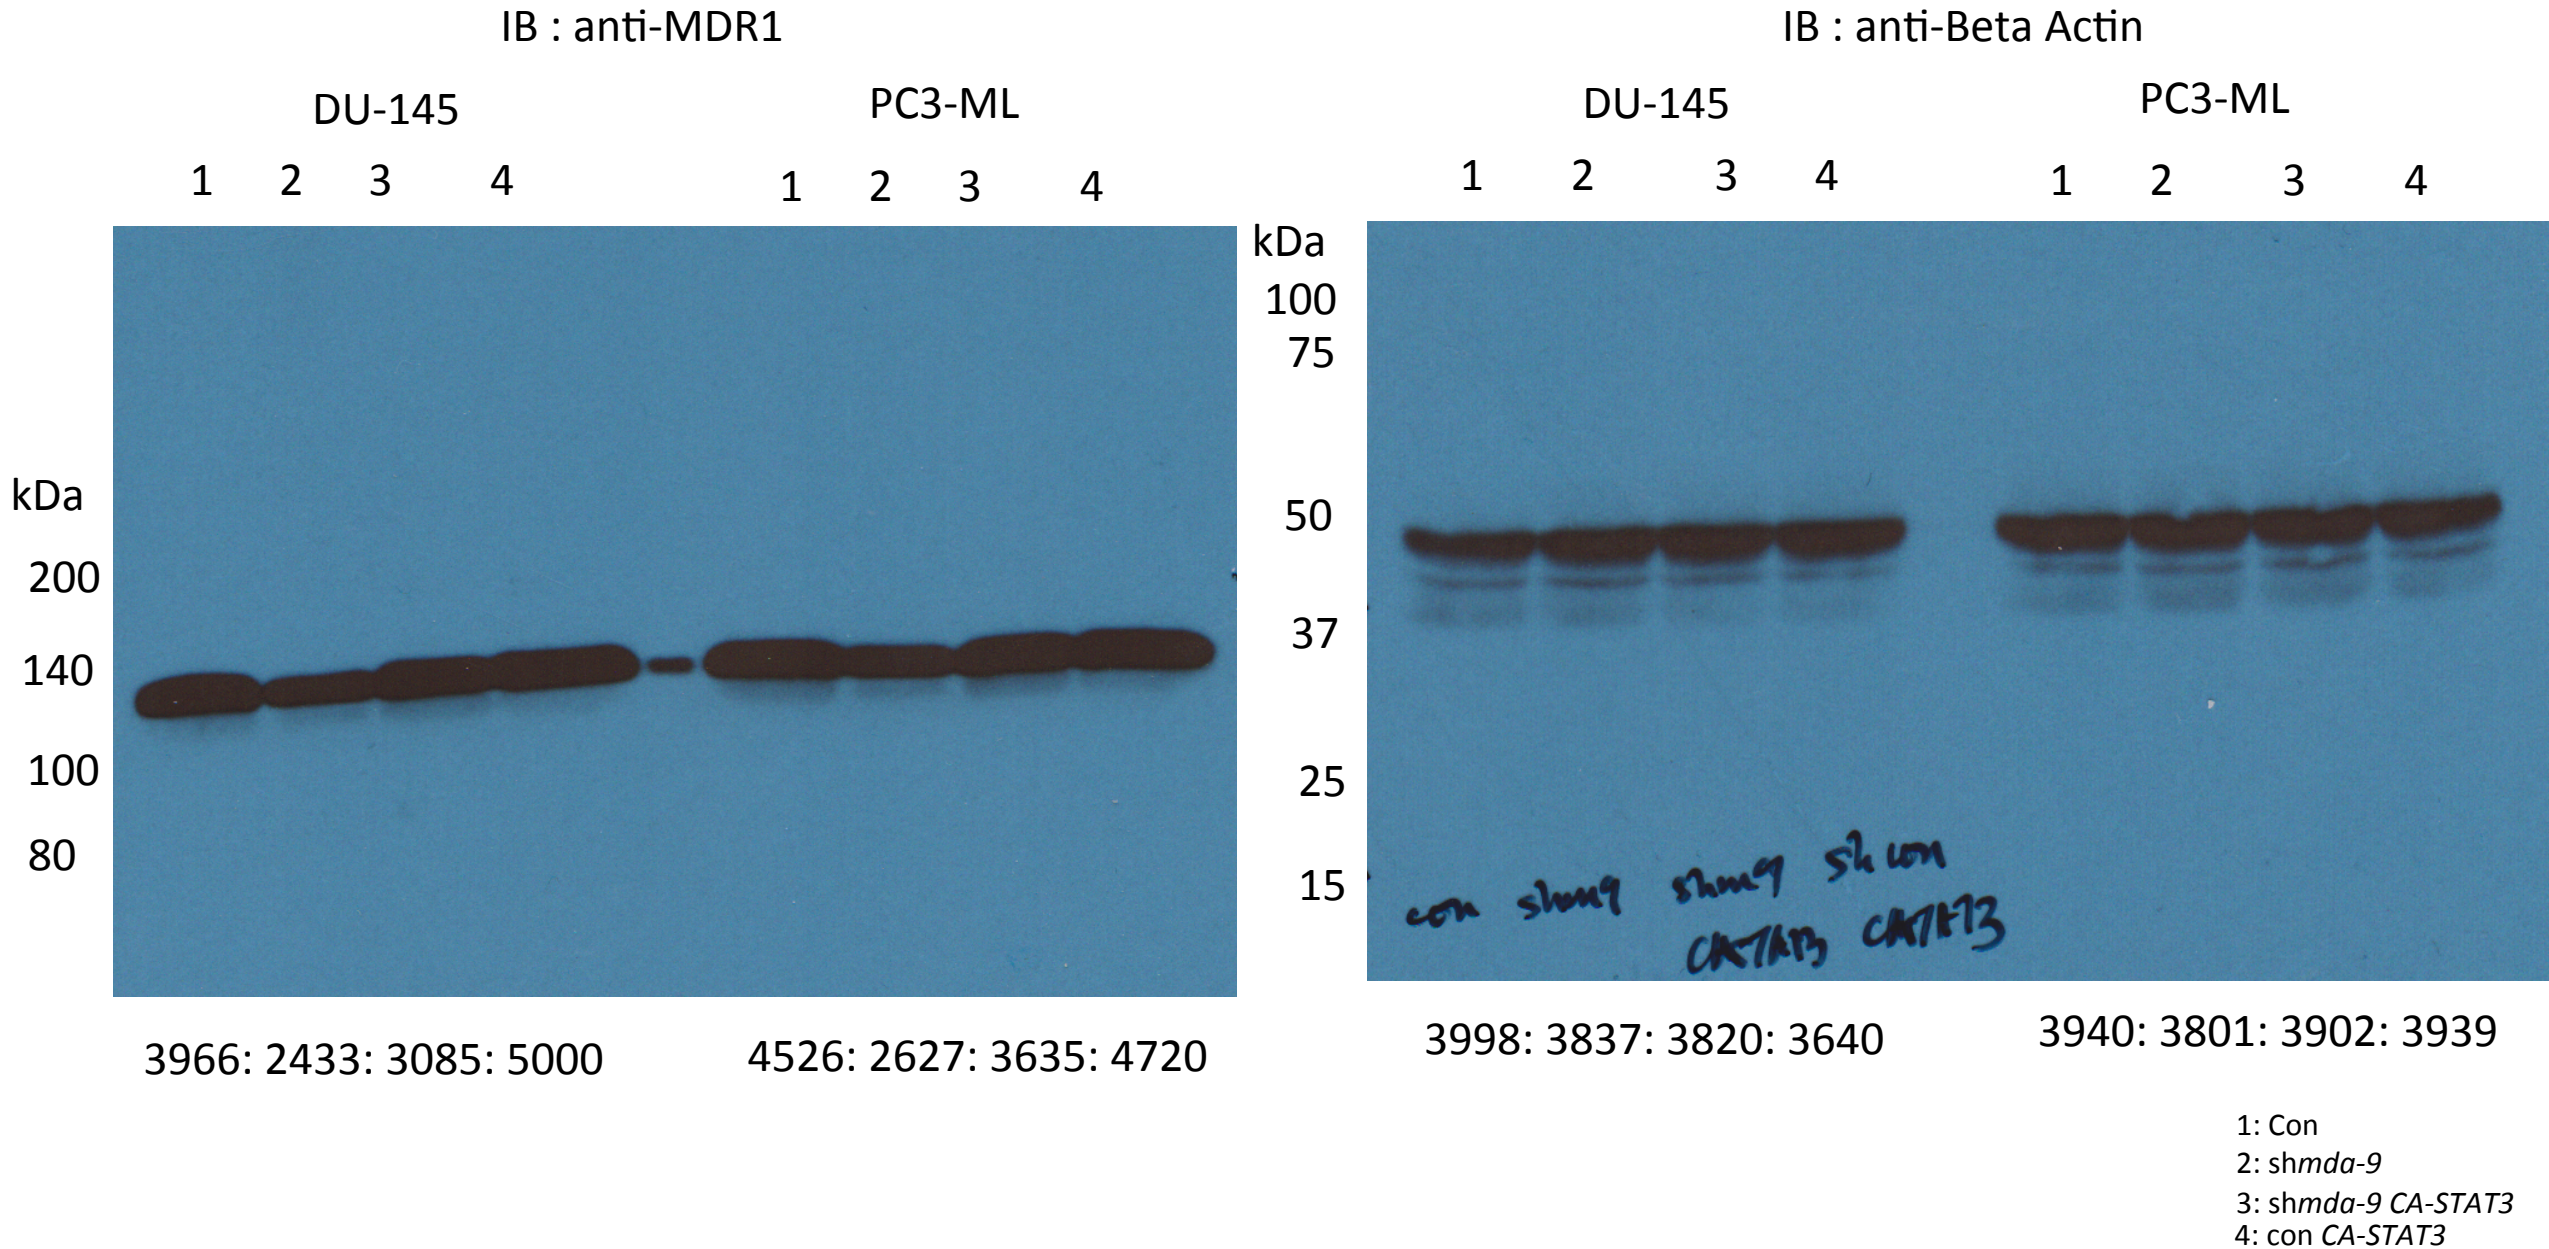

Supplement: s1 [file s1]
